# Supplementary material for: Cobalt complexes of pyrrolecarboxamide ligands as catalysts in nitro reduction reactions: influence of electronic substituents on catalysis and mechanistic insights
Source: Royal Society of Chemistry journal article supplement (doi:10.1039/c6qi00389c), 2016-12-09
Supplement: c6qi00389c1.pdf [file c6qi00389c1.pdf]

## Electronic Supplementary Information

For the Manuscript Entitled

# Cobalt complexes of pyrrolicarboxamide ligands as catalysts in nitro reduction reactions: Influence of electronic substituents on catalysis and mechanistic insights

Sunil Yadav, Sushil Kumar and Rajeev Gupta\*

Department of Chemistry, University of Delhi, Delhi – 110 007

### Index

#### List of Figures:

Figure S1. FTIR spectrum of complex **1**.

Figure S2. FTIR spectrum of complex **2**.

Figure S3. UV/Vis spectra of complex **1** (green trace) and **2** (red trace) in measured in MeOH.

Figure S4. Comparative UV/Vis spectra of complex **1** in MeCN (black trace), DMF (blue trace), and MeOH (green trace).

Figure S5. Comparative UV/Vis spectra of complex **2** in MeCN (red trace), DMF (pink trace), and MeOH (brown trace).

Figure S6. UV/Vis spectrum of complex **1** recorded in MeOH (green trace) and after addition of H<sub>2</sub>O (red and blue traces).

Figure S7. UV/Vis spectrum of complex **2** recorded in MeOH (pink trace) and after addition of H<sub>2</sub>O (green and dark blue traces).

Figure S8. Plots of molar susceptibility ( $\chi_M$ ) and inverse molar susceptibility ( $\chi_M^{-1}$ ) versus temperature for complex **1** (blue circles) and **2** (green circles) measured at 0.5 T.

Figure S9. <sup>1</sup>H NMR spectrum of complex **1** recorded in CD<sub>3</sub>CN. \* and # respectively represent the residual solvent peak and some unidentified impurity.

Figure. S10. UV-Vis titration of complex **1** with 4-nitrotolene in MeOH. Top Inset: Change in absorbance as a function of moles of 4-nitrotolene. Bottom Inset: Linear regression fitting curve for 1:2 binding between complex **1** and 4-nitrotolene.

Figure. S11. UV-Vis titration of complex **2** with 4-nitrotolene in MeOH. Top Inset: Change in absorbance as a function of moles of 4-nitrotolene. Bottom Inset: Linear regression fitting curve for 1:2 binding between complex **2** and 4-nitrotolene.

Figure S12. UV-Vis titration of complex **2** with aniline in MeOH. Top Inset: Change in absorbance as a function of moles of aniline. Bottom Inset: Linear regression fitting curve for 1:2 binding between complex **2** and aniline.

Figure S13. UV-Vis spectral titration of complex **2** with hydrazine in MeOH; and change in absorption intensity as a function of moles of hydrazine (inset).

Figure S14. Change in cyclic voltammograms of complex **1** as a function of hydrazine in MeOH.

Figure S15. Change in cyclic voltammograms of complex **2** as a function of hydrazine in MeOH.

Figure S16. Recyclability experiment of complex **2** with respect to hydrazine; original absorption spectrum of complex **2** (trace A) followed by reduction with 0.25 equiv.  $\text{NH}_2\text{NH}_2$  further followed by oxidation with  $\text{O}_2$  (traces B – E). Inset displays subsequent two regenerative cycles.

Figure S17. UV-vis spectra monitored at different time intervals during the reduction of nitrobenzene with hydrazine in MeOH using complex **1** as the catalyst.

Figure S18.  $^1\text{H}$  NMR spectrum (recorded in  $\text{CDCl}_3$ ) of a reaction mixture during the reduction of nitrobenzene with hydrazine in MeOH using complex **1** as the catalyst.

Figure S19.  $^1\text{H}$  NMR spectrum (recorded in  $\text{CDCl}_3$ ) of a reaction mixture displaying the formation of *N*-phenylhydroxylamine as one of the products during the reduction of nitrobenzene with hydrazine in MeOH using complex **1** as the catalyst.

Figure S20. Recyclability experiments for the reduction of *para*- $\text{CNPhNO}_2$  with hydrazine in MeOH using complex **1** as a catalyst. In this experiment, a fixed amount of complex **1** (1-mol%) was taken in a reaction flask while fresh batches of *para*- $\text{CNPhNO}_2$  (1 equiv.) and hydrazine (2 equiv.) were added in five consecutive runs.

Figure S21. Recyclability experiments for the reduction of *para*- $\text{CNPhNO}_2$  with hydrazine in MeOH using complex **1** as a catalyst which was isolated at the end of every catalytic cycle (runs 1 – 5) and reused in the next cycle without any purification.

Figure S22. Comparative FTIR spectra of complex **1** before (green trace) and after (black trace) the catalysis.

Figure S23. Comparative FTIR spectra of complex **2** before (red trace) and after (black trace) the catalysis.

Figure S24. Comparative powder XRD patterns of as synthesized complex **1** (green trace) and the one measured after the catalysis (black trace).

Figure S25. Comparative powder XRD patterns of as synthesized complex **2** (red trace) and the one measured after the catalysis (black trace).

### **List of Tables:**

Table S1. Crystallographic data collection and structure refinement parameters for complex **1**.

Table S2. Selected bond lengths ( $\text{\AA}$ ) and bond angles ( $^\circ$ ) for complex **1**.

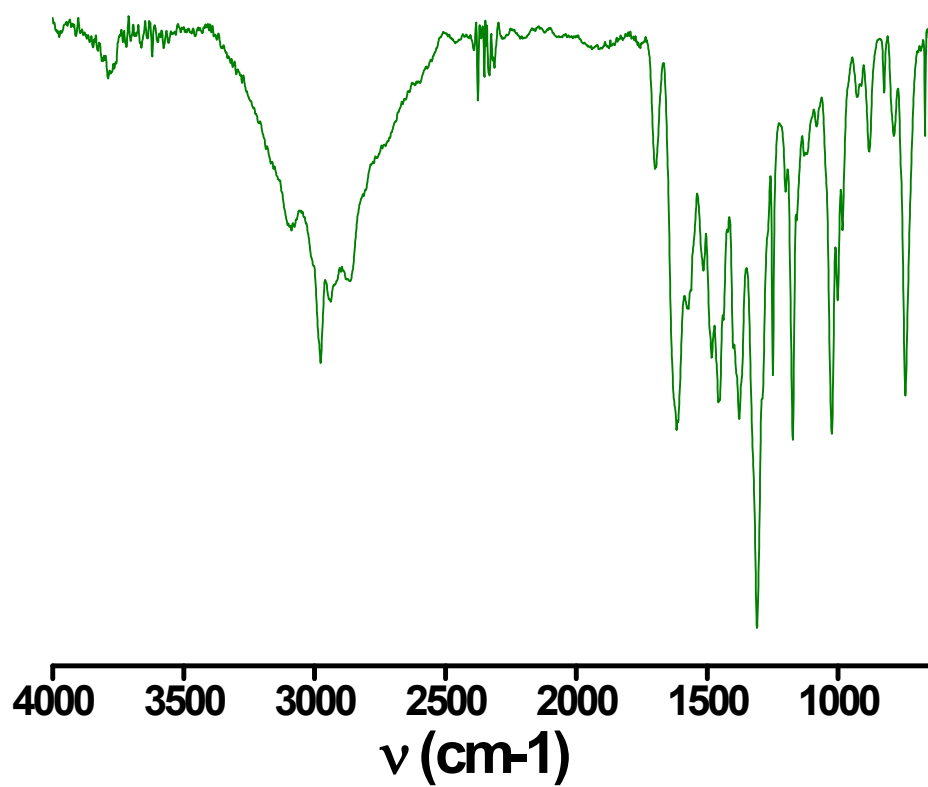

Figure S1. FTIR spectrum of complex 1.

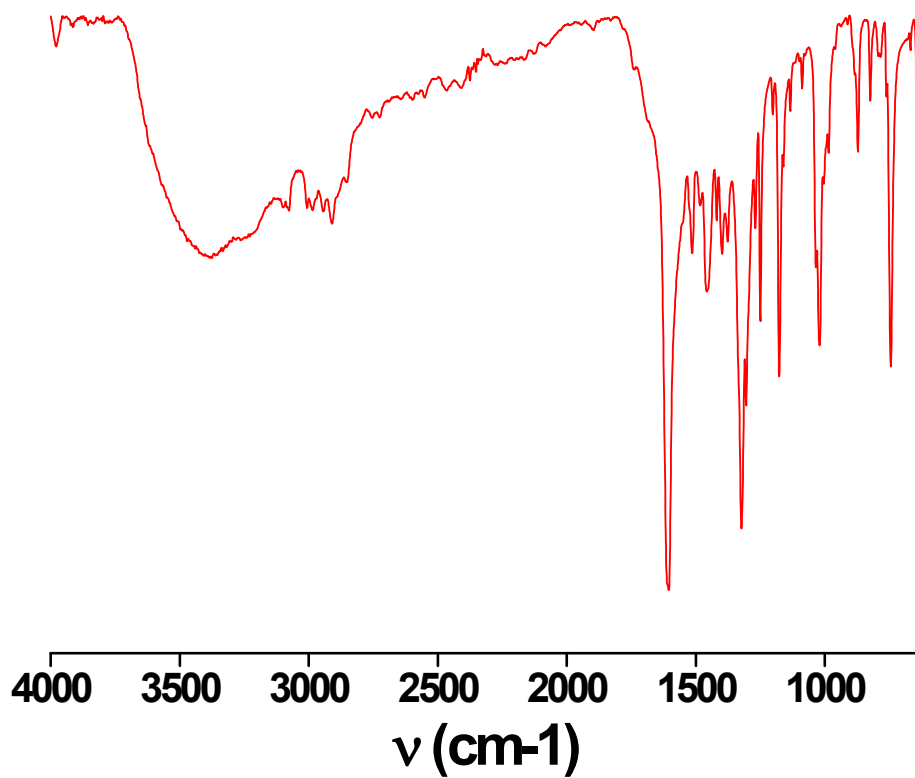

Figure S2. FTIR spectrum of complex 2.

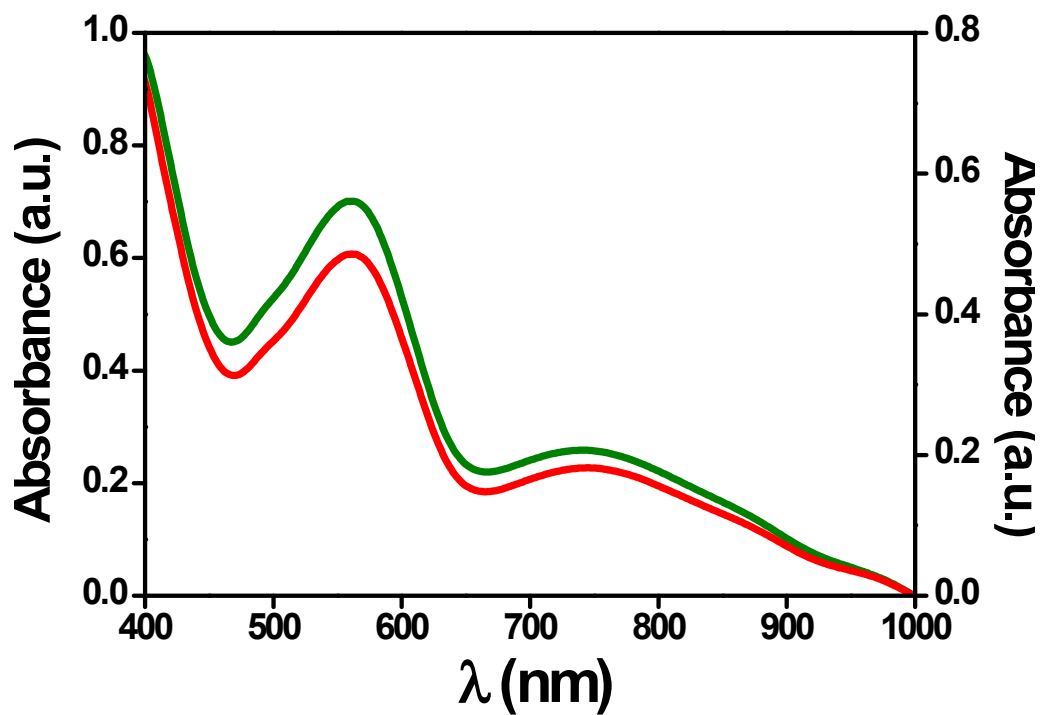

Figure S3. UV/Vis spectra of complex 1 (green trace) and 2 (red trace) measured in MeOH.

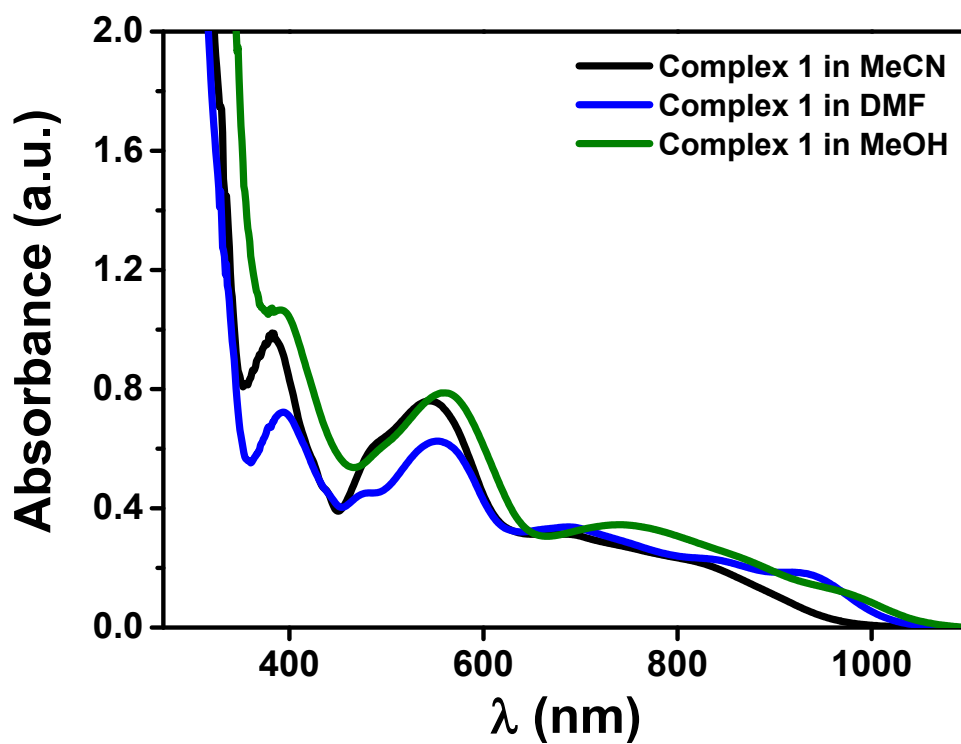

Figure S4. Comparative UV/Vis spectra of complex 1 in MeCN (black trace), DMF (blue trace), and MeOH (green trace).

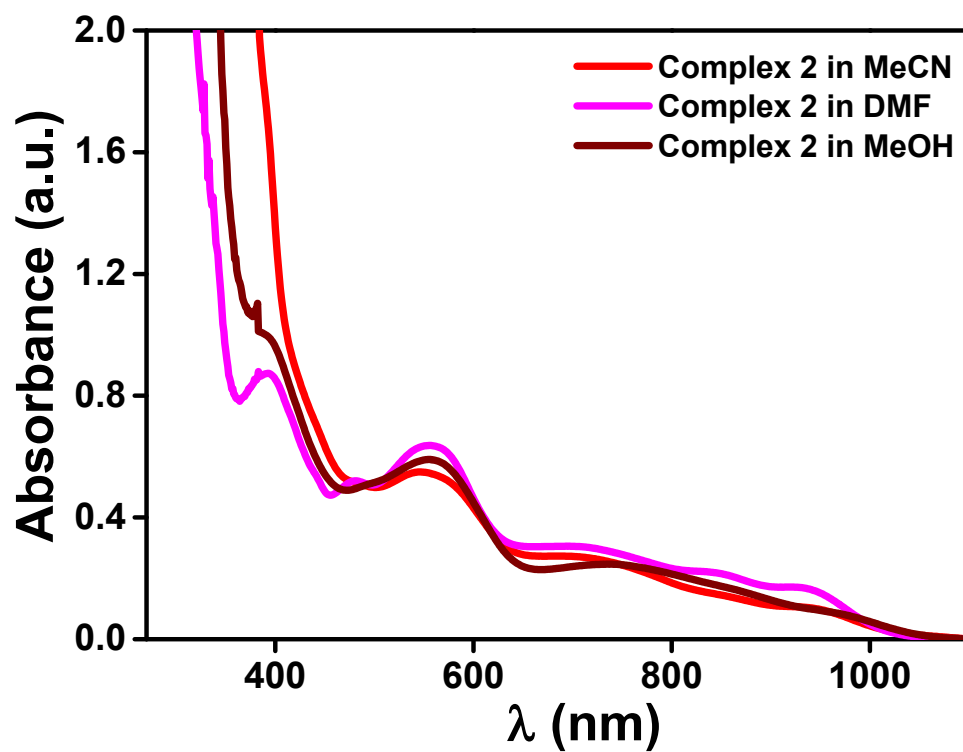

Figure S5. Comparative UV/Vis spectra of complex 2 in MeCN (red trace), DMF (pink trace), and MeOH (brown trace).

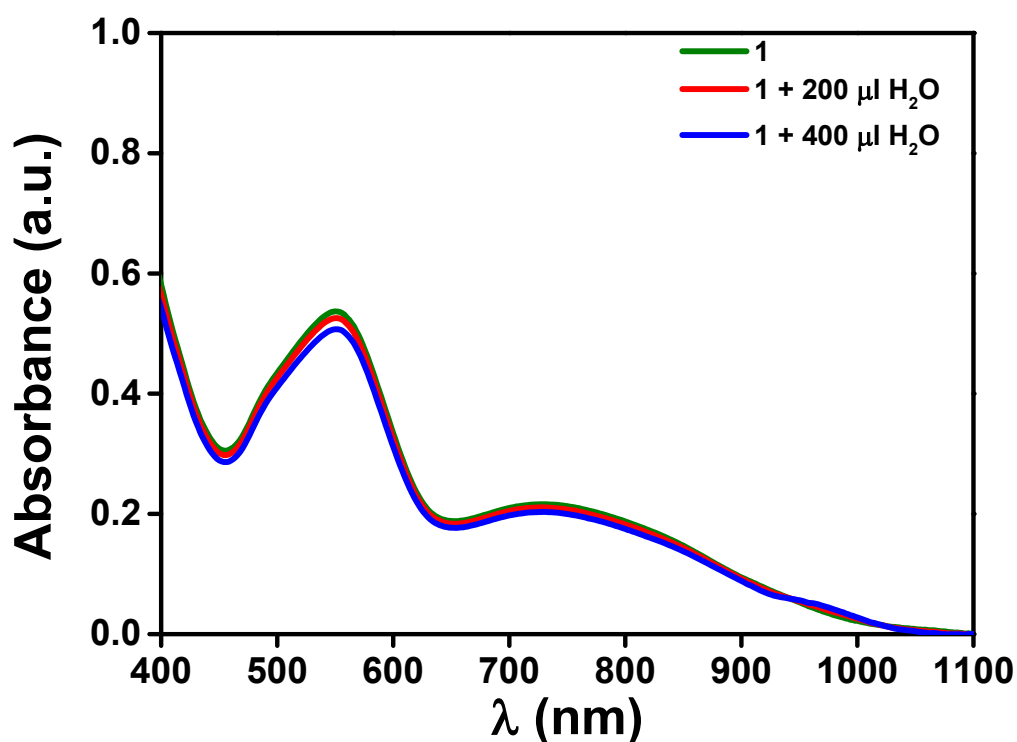

Figure S6. UV/Vis spectrum of complex 1 recorded in MeOH (green trace) and after addition of H<sub>2</sub>O (red and blue traces).

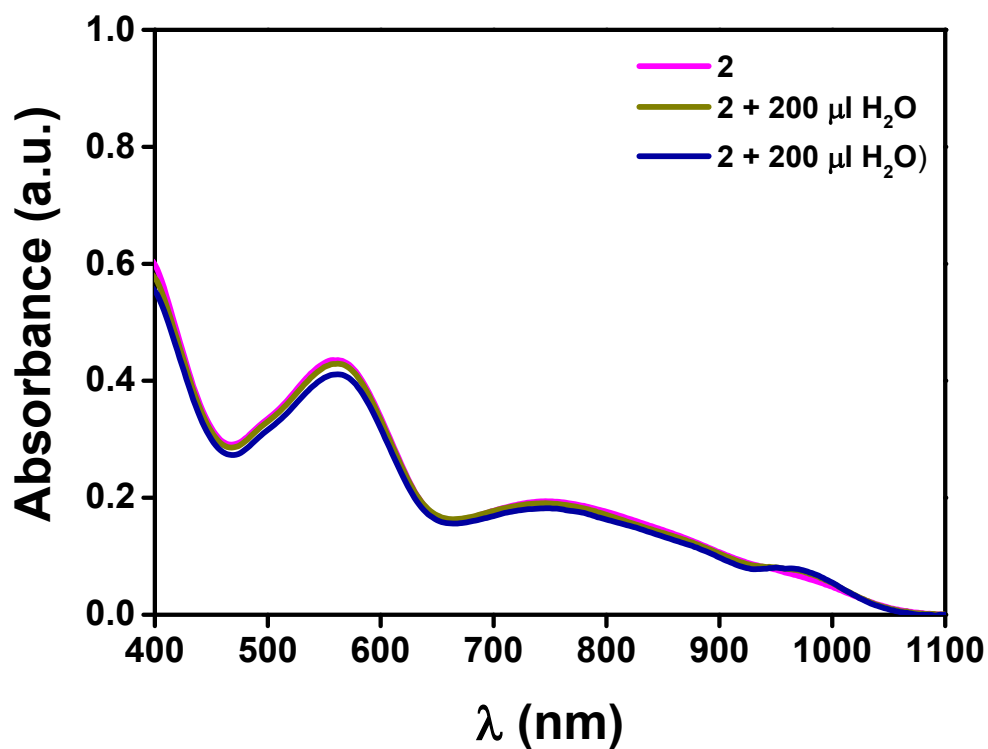

Figure S7. UV/Vis spectrum of complex **2** recorded in MeOH (pink trace) and after addition of  $\text{H}_2\text{O}$  (green and dark blue traces).

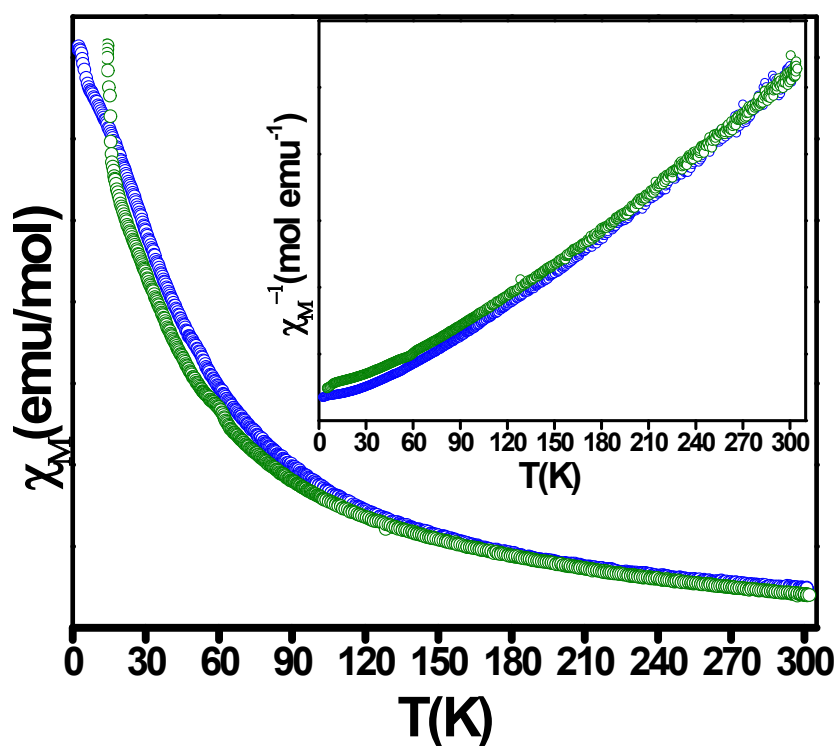

Figure S8. Plots of molar susceptibility ( $\chi_M$ ) and inverse molar susceptibility ( $\chi_M^{-1}$ ) versus temperature for complex **1** (blue circles) and **2** (green circles) measured at 0.5 T.

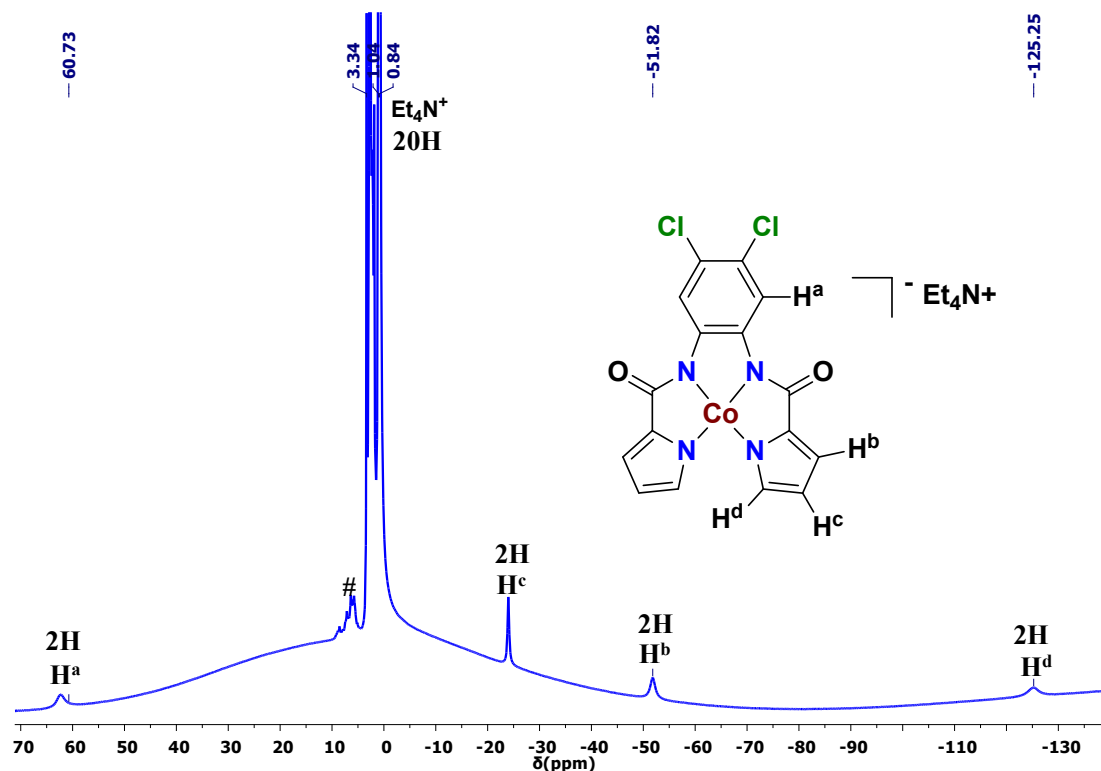

Figure S9.  $^1\text{H}$  NMR spectrum of complex **1** recorded in  $\text{CD}_3\text{CN}$ . \* and # respectively represent the residual solvent peak and some unidentified impurity.

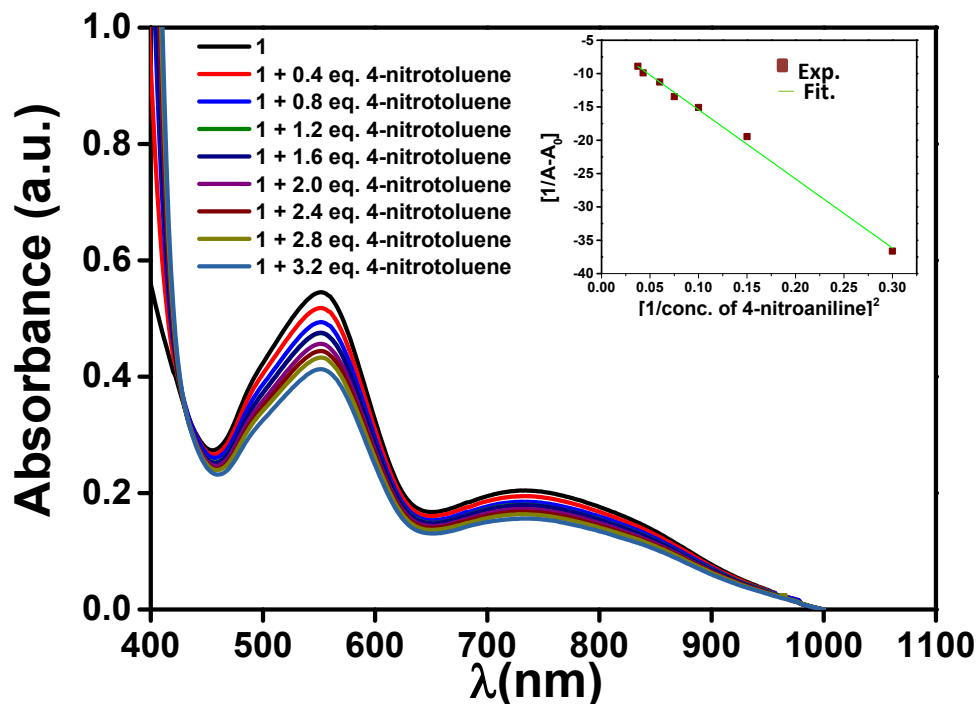

Figure. S10. UV-Vis titration of complex **1** with 4-nitrotoluene in  $\text{MeOH}$ . Top Inset: Change in absorbance as a function of moles of 4-nitrotoluene. Bottom Inset: Linear regression fitting curve for 1:2 binding between complex **1** and 4-nitrotoluene.

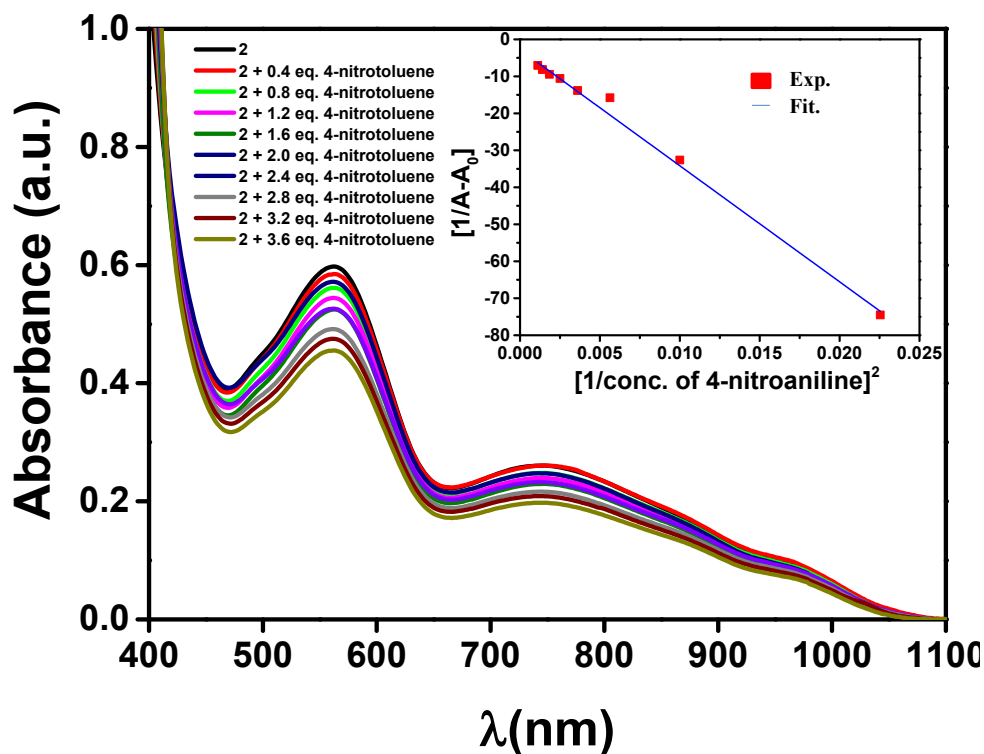

Figure. S11. UV-Vis titration of complex **2** with 4-nitrotoluene in MeOH. Top Inset: Change in absorbance as a function of moles of 4-nitrotoluene. Bottom Inset: Linear regression fitting curve for 1:2 binding between complex **2** and 4-nitrotoluene.

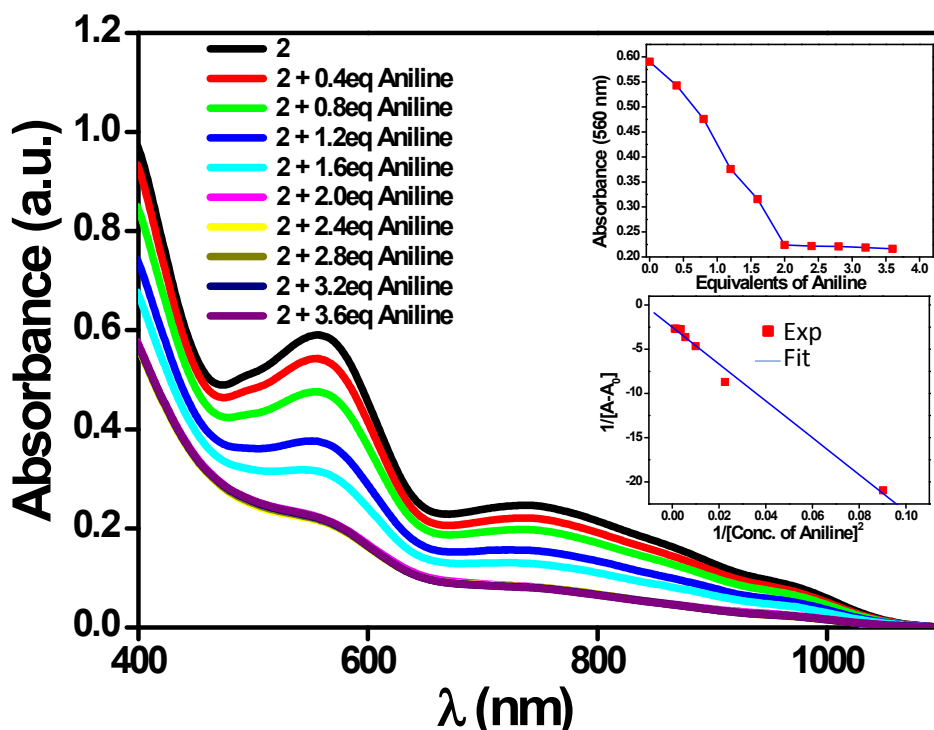

Figure. S12. UV-Vis titration of complex **2** with aniline in MeOH. Top Inset: Change in absorbance as a function of moles of aniline. Bottom Inset: Linear regression fitting curve for 1:2 binding between complex **2** and aniline.



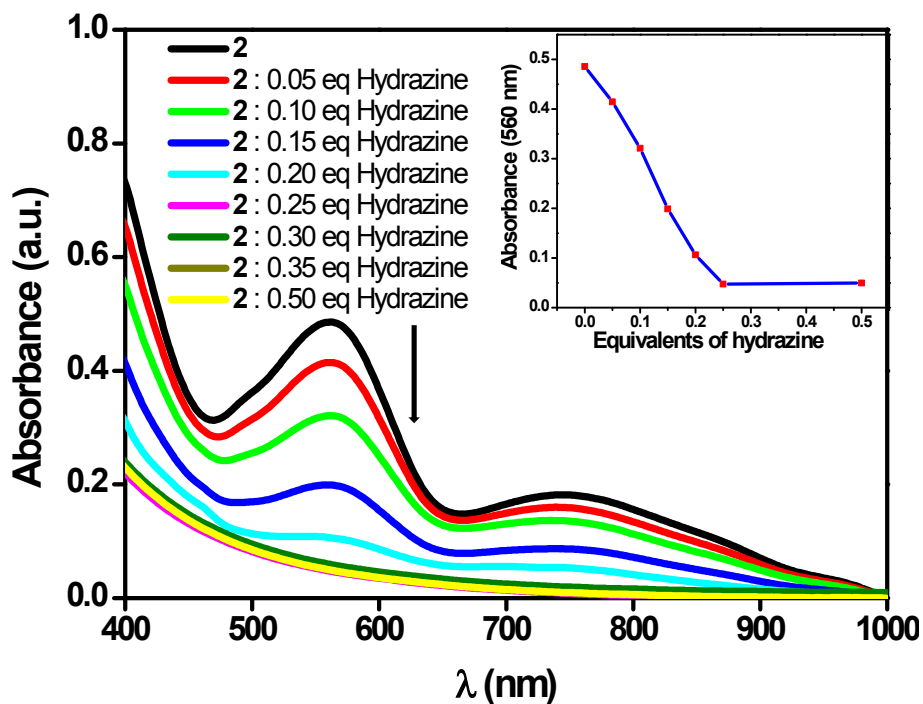

Figure S13. UV-Vis spectral titration of complex **2** with hydrazine in MeOH; and change in absorption intensity as a function of moles of hydrazine (inset).

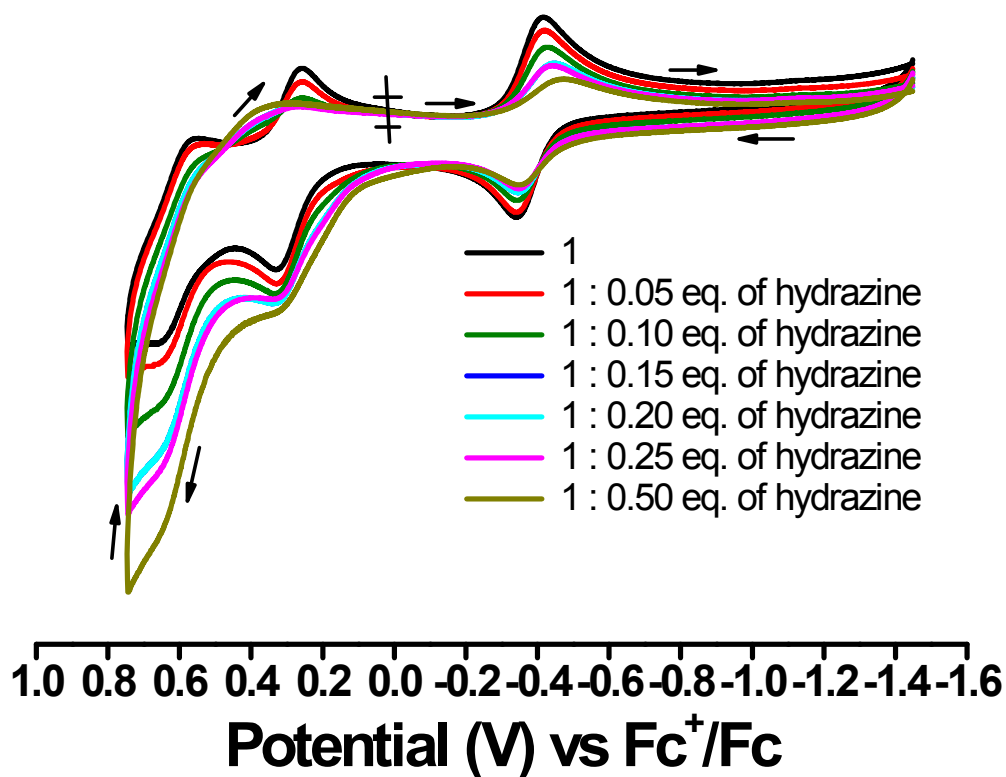

Figure S14. Change in cyclic voltammograms of complex **1** as a function of hydrazine in MeOH.

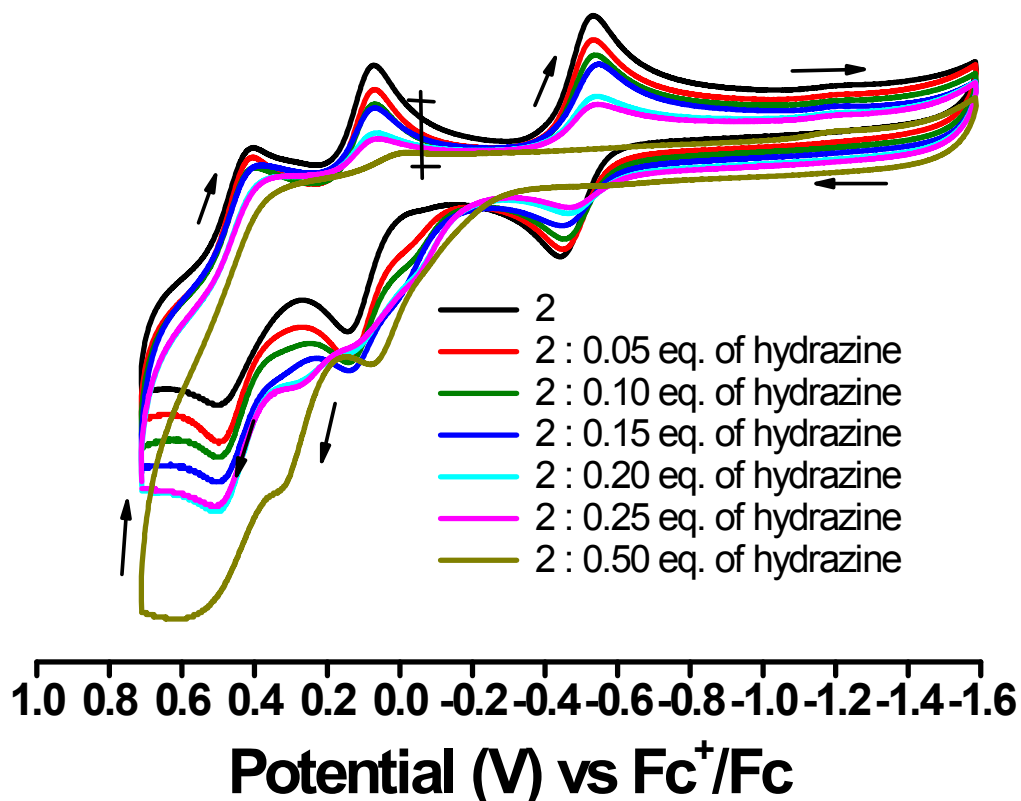

Figure S15. Change in cyclic voltammograms of complex 2 as a function of hydrazine in MeOH.

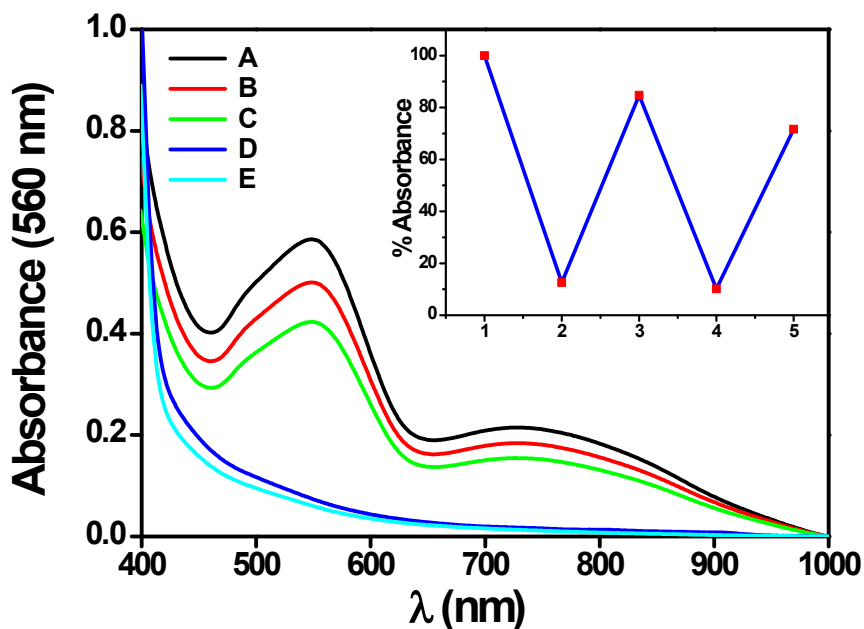

Figure S16. Recyclability experiment of complex 2 with respect to hydrazine; original absorbance spectrum of complex 2 (trace A) followed by reduction with 0.25 equiv.  $NH_2NH_2$  further followed by oxidation with  $O_2$  (traces B – E). Inset displays subsequent two regenerative cycles.

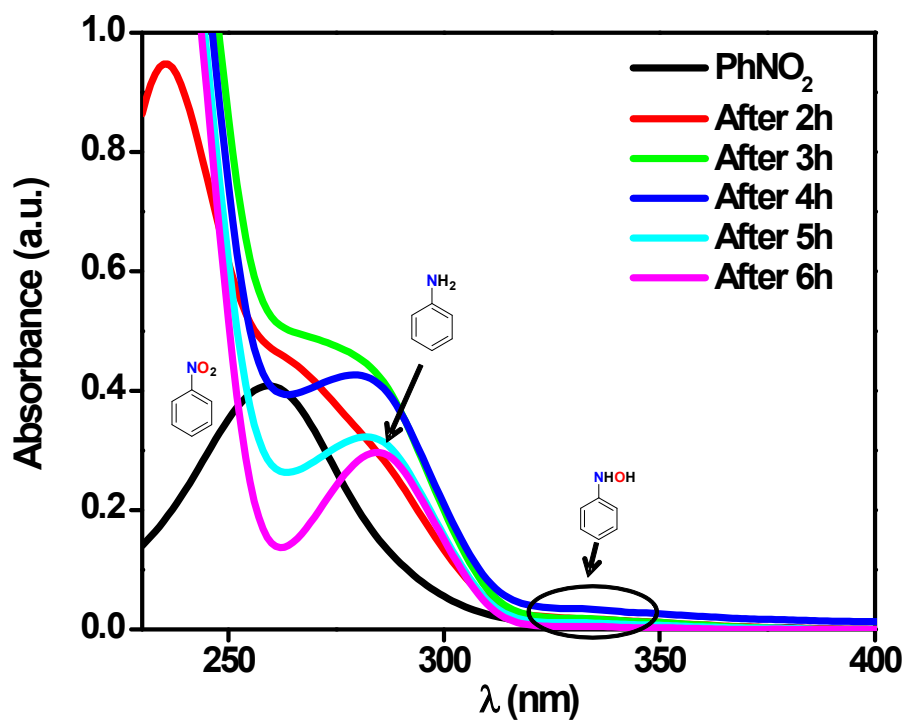

Figure S17. UV-vis spectra monitored at different time intervals during the reduction of nitrobenzene with hydrazine in MeOH using complex **1** as the catalyst.

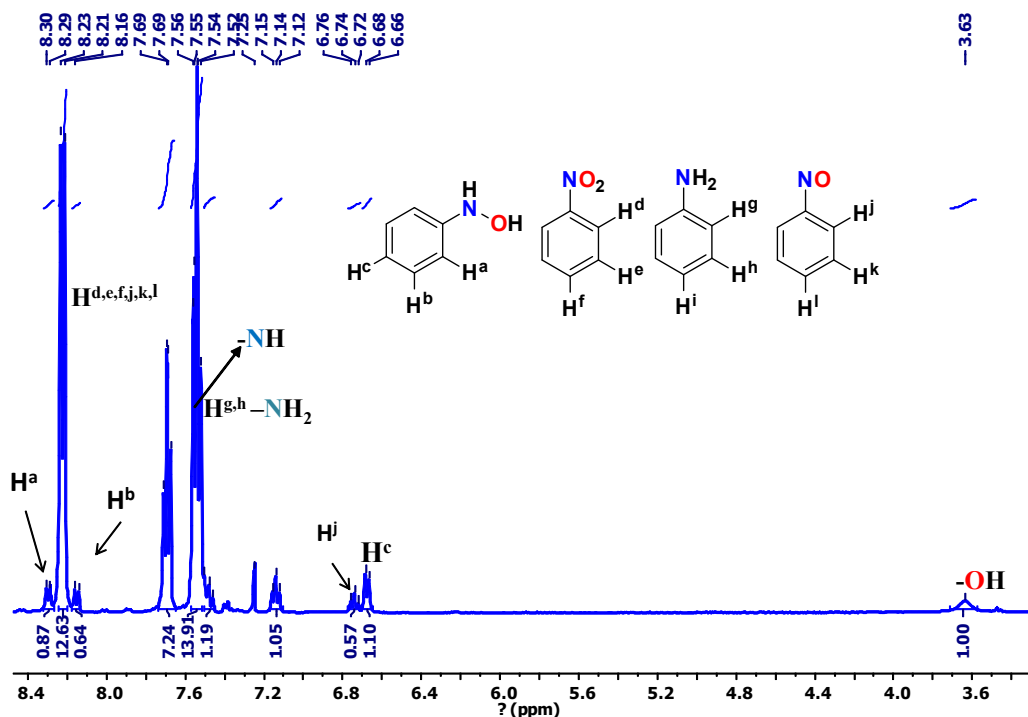

Figure S18. <sup>1</sup>H NMR spectrum (recorded in CDCl<sub>3</sub>) of a reaction mixture during the reduction of nitrobenzene with hydrazine in MeOH using complex **1** as the catalyst.

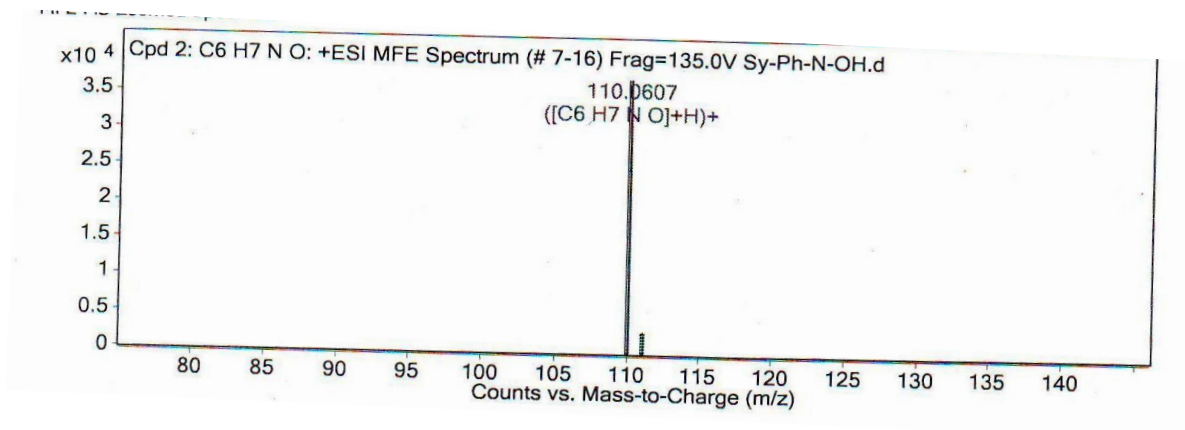

Figure S19. <sup>1</sup>H NMR spectrum (recorded in CDCl<sub>3</sub>) of a reaction mixture displaying the formation of *N*-phenylhydroxylamine as one of the products during the reduction of nitrobenzene with hydrazine in MeOH using complex **1** as the catalyst.

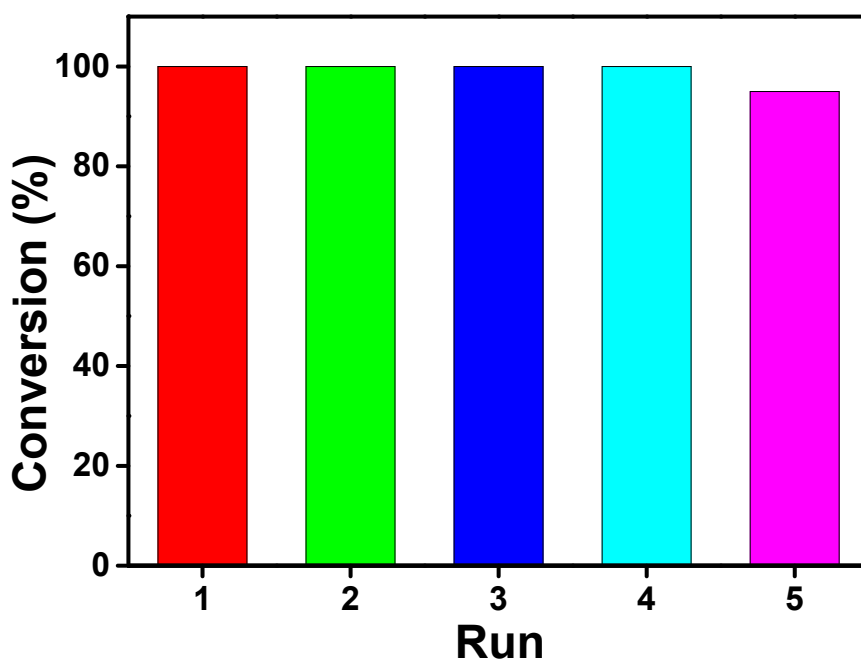

Figure S20. Recyclability experiments for the reduction of *para*-CNPhNO<sub>2</sub> with hydrazine in MeOH using complex **1** as a catalyst. In this experiment, a fixed amount of complex **1** (1-mol%) was taken in a reaction flask while fresh batches of *para*-CNPhNO<sub>2</sub> (1 equiv.) and hydrazine (2 equiv.) were added in five consecutive runs.

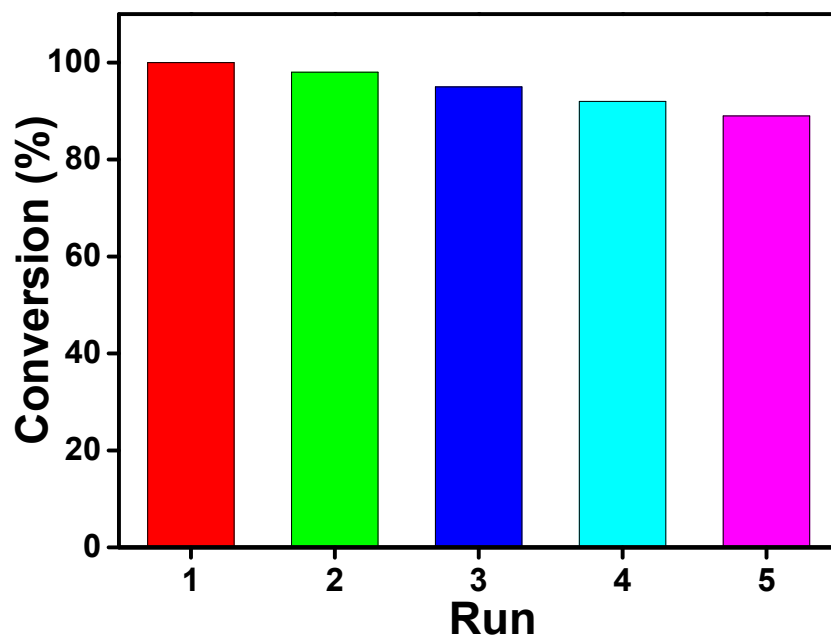

Figure S21. Recyclability experiments for the reduction of *para*-CNPhNO<sub>2</sub> with hydrazine in MeOH using complex **1** as a catalyst which was isolated at the end of every catalytic cycle (runs 1 – 5) and reused in the next cycle without any purification.

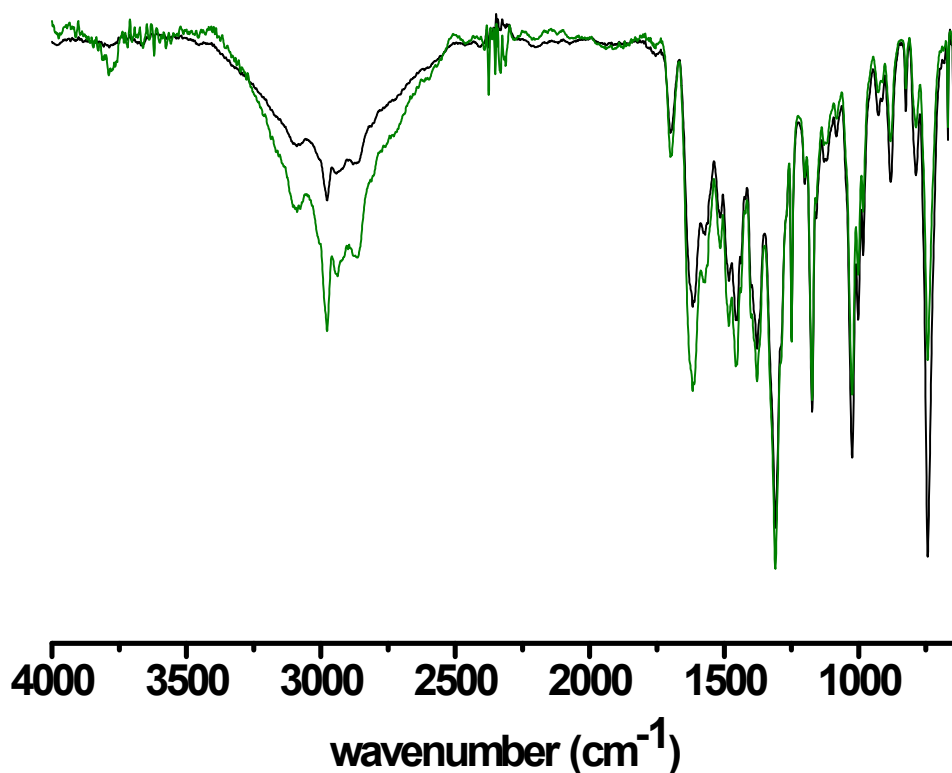

Figure S22. Comparative FTIR spectra of complex **1** before (green trace) and after (black trace) the catalysis.

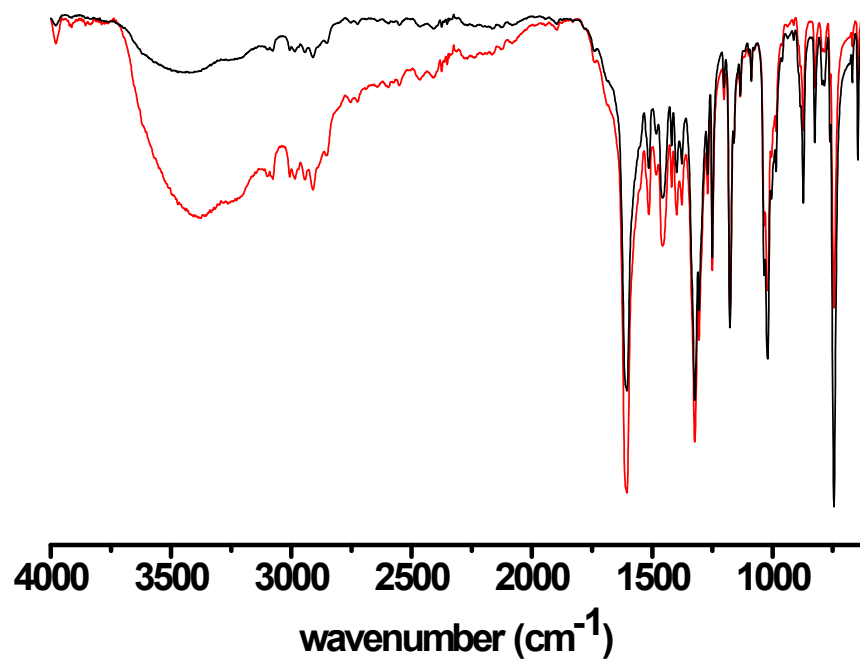

Figure S23. Comparative FTIR spectra of complex 2 before (red trace) and after (black trace) the catalysis.

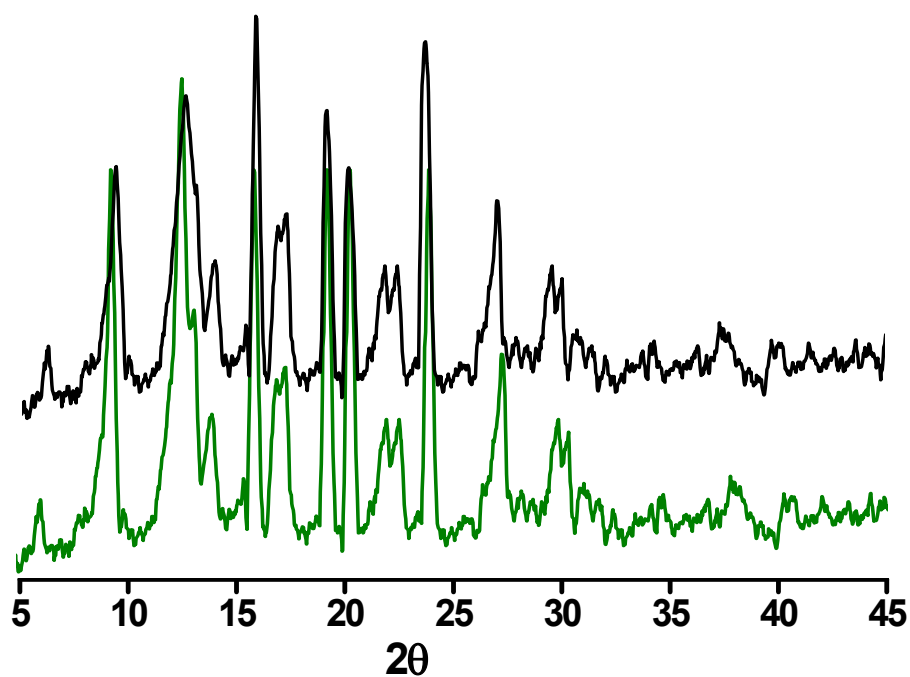

Figure S24. Comparative powder XRD patterns of as synthesized complex 1 (green trace) and the one measured after the catalysis (black trace).

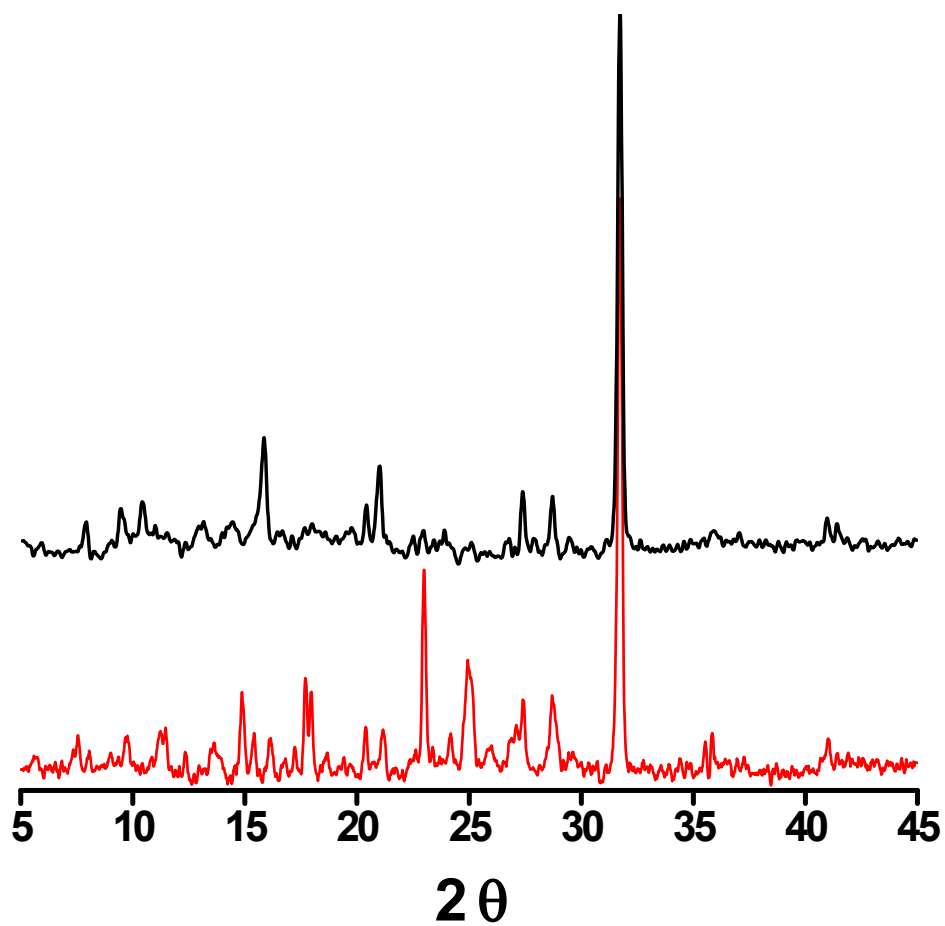

Figure S25. Comparative powder XRD patterns of as synthesized complex **2** (red trace) and the one measured after the catalysis (black trace).

Table S1. Crystallographic data collection and structure refinement parameters for complex **1**.

|                                                                     |                                                                                  |
|---------------------------------------------------------------------|----------------------------------------------------------------------------------|
| Empirical formula                                                   | C <sub>24</sub> H <sub>28</sub> N <sub>5</sub> O <sub>2</sub> Cl <sub>2</sub> Co |
| Formula weight                                                      | 548.34                                                                           |
| Temperature                                                         | 293(2) K                                                                         |
| Wavelength                                                          | 0.71073 Å                                                                        |
| Crystal system                                                      | orthorhombic                                                                     |
| Space group                                                         | <i>P</i> 2 <sub>1</sub> 2 <sub>1</sub> 2 <sub>1</sub>                            |
| <i>a</i>                                                            | 12.4118(9) Å                                                                     |
| <i>b</i>                                                            | 13.9055(16) Å                                                                    |
| <i>c</i>                                                            | 13.9670(16) Å                                                                    |
| $\alpha$                                                            | 90°                                                                              |
| $\beta$                                                             | 90°                                                                              |
| $\gamma$                                                            | 90°                                                                              |
| Volume                                                              | 2410.6(4) Å <sup>3</sup>                                                         |
| <i>Z</i>                                                            | 4                                                                                |
| Density (calculated)                                                | 1.511 Mg/m <sup>3</sup>                                                          |
| Absorption coefficient                                              | 0.966 mm <sup>-1</sup>                                                           |
| <i>F</i> (000)                                                      | 1136                                                                             |
| Crystal size                                                        | 0.23 x 0.22 x 0.19 mm <sup>3</sup>                                               |
| Theta range for data collection                                     | 3.26 to 25.00°                                                                   |
| Index ranges                                                        | -14 ≤ <i>h</i> ≤ 14, -14 ≤ <i>k</i> ≤ 16, -16 ≤ <i>l</i> ≤ 14                    |
| Reflections collected                                               | 9844                                                                             |
| Independent reflections                                             | 4184 [ <i>R</i> (int) = 0.0756]                                                  |
| Completeness to theta = 25.00°                                      | 98.9 %                                                                           |
| Absorption correction                                               | Multi-scan                                                                       |
| Max. and min. transmission                                          | 0.8377 and 0.8084                                                                |
| Refinement method                                                   | Full-matrix least-squares on <i>F</i> <sup>2</sup>                               |
| Data / restraints / parameters                                      | 4184 / 0 / 307                                                                   |
| Goodness-of-fit on <i>F</i> <sup>2</sup>                            | 1.167                                                                            |
| Final <i>R</i> indices [ <i>I</i> > 2σ( <i>I</i> )] <sup>a, b</sup> | <i>R</i> <sub>1</sub> = 0.0835, <i>wR</i> <sub>2</sub> = 0.2028                  |
| <i>R</i> indices (all data)                                         | <i>R</i> <sub>1</sub> = 0.0919, <i>wR</i> <sub>2</sub> = 0.2060                  |
| Largest diff. peak and hole                                         | 1.540 and -0.848 e.Å <sup>-3</sup>                                               |

$$^a R = \sum(|F_o| - |F_c|) / \sum |F_o| ; ^b wR = \{\sum[w(F_o^2 - F_c^2)^2] / \sum[w(F_o^2)^2]\}^{1/2}$$
